# Supplementary material
Source: PubMed Central journal article supplement (PMC8597751)

1 **Supplemental figure legends:**

2 **Supplemental Figure 1** – A) Depiction of represented neutral, underrepresented and domain  
3 genes. On the X-axis, the 3 genes are represented 5' to 3' to relative scale, with number of  
4 transposon (Tn) reads at that TA site on the Y axis. Many TA sites had more than 10 reads. B)  
5 OD<sub>600</sub> of *S. marcescens* ATCC 13880 TIS library during the antibiotic screen. C) Beta-lactamase  
6 (AmpC) activity under conditions of the antibiotic screen. As expected, cefoxitin, which is a  
7 strong inducer of AmpC, results in large increases in beta-lactamase activity, as determined  
8 through hydrolysis of nitrocefin, a chromogenic cephalosporin substrate. D,E) “Volcano” plot  
9 illustrating candidate genes important for ciprofloxacin (in D) and cefepime (in E) susceptibility.  
10 On the X-axis is the log<sub>2</sub>fold-change (Log<sub>2</sub>FC) in insertion-mutant abundance in antibiotic (CIP  
11 and FEP) compared to no drug. The Y-axis is the inverse Mann-Whitney U *p*-value (1/MWU *p*-  
12 val), which roughly measures the concordance between mutants with insertions at individual  
13 TA sites across a gene. Genes were depleted (red) if Log<sub>2</sub>FC ≤ 2 and 1/MWU *p*-val ≥ 100. Genes  
14 were enriched (blue) if Log<sub>2</sub>FC ≥ 2 and 1/MWU *p*-val ≥ 100.

15 **Supplemental Figure 2** – *YdgH* locus. Sigma-70 promoters with scores of 90 or greater in BacPP  
16 and rho-independent terminators identified by ARNold are indicated.

17 **Supplemental Figure 3** – Growth curves of *S. marcescens* ATCC 13880 Wt or  $\Delta ydgH$  in LB alone  
18 or in LB supplemented with the indicated concentrations (in ug/mL) of A) the 3<sup>rd</sup> generation  
19 cephalosporin moxalactam; B) the 3<sup>rd</sup> generation cephalosporin ceftriaxone; C) the 1<sup>st</sup>  
20 generation cephalosporin cephalixin; D) the anti-Pseudomonal cephalosporins ceftazidime and  
21 E) cefepime. Informative concentrations used in calculating the OD600 ratios depicted in the

22 main text are depicted. Results for the full range of concentrations tested are in Supplemental  
23 Table 4.

24 **Supplemental Figure 4** – Growth curves of *S. marcescens* ATCC 13880 Wt or  $\Delta ydgH$  in LB alone  
25 or in LB supplemented with the indicated concentrations (in ug/mL) of the penicillins A)  
26 carbenicillin or B) piperacillin; and the carbapenems C) imipenem and D) meropenem. E) AmpC  
27 activity is not different in  $\Delta ydgH$  compared to Wt, as measured by bulk nitrocefin hydrolysis of  
28 clarified supernatant.

29 **Supplemental Figure 5** - Growth curves of *S. marcescens* ATCC 13880 Wt or  $\Delta ydgH$  in LB alone  
30 or in LB supplemented with the indicated concentrations (in ug/mL) of the non-beta lactam  
31 antibiotics A) ciprofloxacin; B) trimethoprim; C) gentamicin and; D) chloramphenicol.

32 **Supplemental Figure 6** - Growth curves of *S. marcescens* ATCC 13880 Wt or  $\Delta ydgH$  in LB alone  
33 or in LB supplemented with the indicated concentrations (in ug/mL) of the antibiotics to which  
34 *S. marcescens* ATCC 13880 is intrinsically resistant, A) rifampin; B) bacitracin; and F) polymyxin  
35 B). Benzalkonium chloride and benzethonium chloride are depicted in D) and E). SDS  
36 concentrations in C) are (v/v).

37 **Supplemental table 1** – Potential transposon insertion sites (genomic TA dinucleotides) along  
38 with the amount of observed insertions on the + and - strands are tabulated along with the  
39 annotated locus.

40 **Supplemental table 2** – Essential/underrepresented gene analysis of *S. marcescens* ATCC 13880  
41 as determined through TIS and the EL-ARTIST pipeline. Summary statistics of  
42 essential/underrepresented genes underlying the analyses in Figure 1 are tabulated.

43 **Supplemental table 3** – Essential/underrepresented genes unique to *S. marcescens* ATCC 13880  
44 compared to both from *E. coli* K12 using either TIS and the EL-ARTIST pipeline or based on  
45 single gene deletion attempts resulting in the KEIO collection.

46 **Supplemental table 4** – Full TIS analysis identifying candidate genes important for outgrowth in  
47 no drug, cefoxitin, cefepime, or ciprofloxacin.

48 **Supplemental table 5** – Tabulation of those genes with  $\text{Log}_2\text{FC} \leq 2$  and  $1/\text{MWU p-val} \geq 100$  used  
49 to generate the Venn diagram in Figure 2D.

50 **Supplemental table 6** – Raw data from all final concentrations of chemical/antibiotic stressors  
51 used to generate main text figure 5 and the corresponding supplemental figures.

52 **Supplemental table 7** – Primers used for creation of pTOX3 allelic exchange vectors and  
53 pBAD33-*ydgH*.

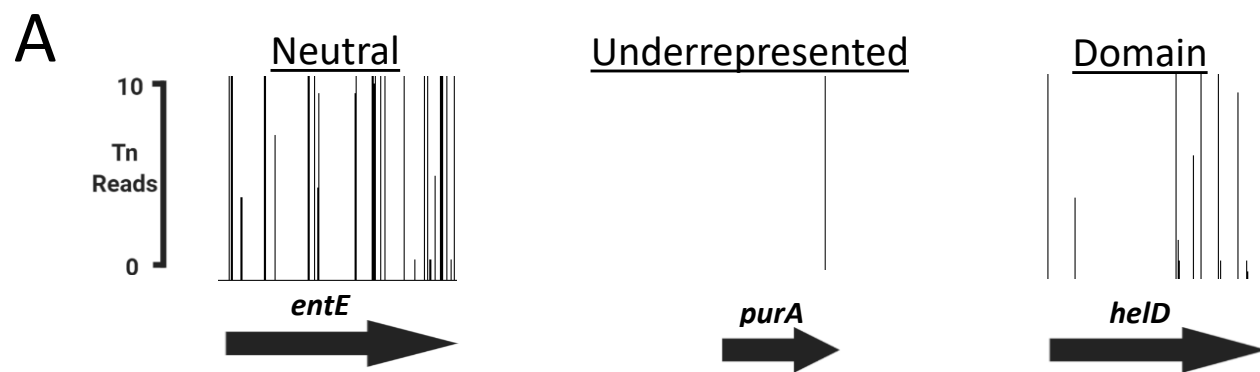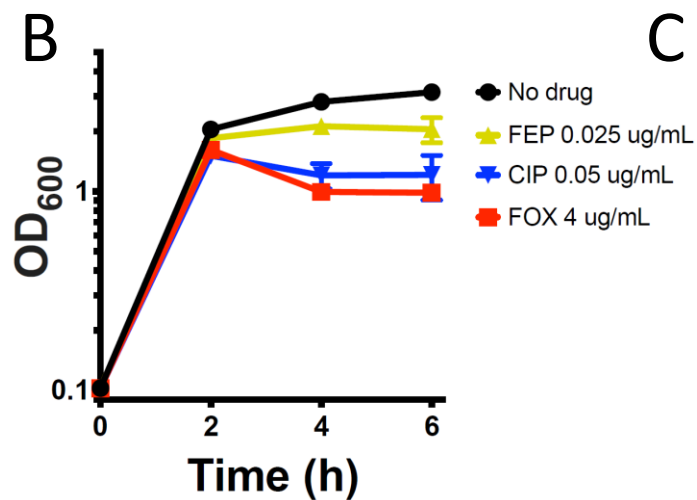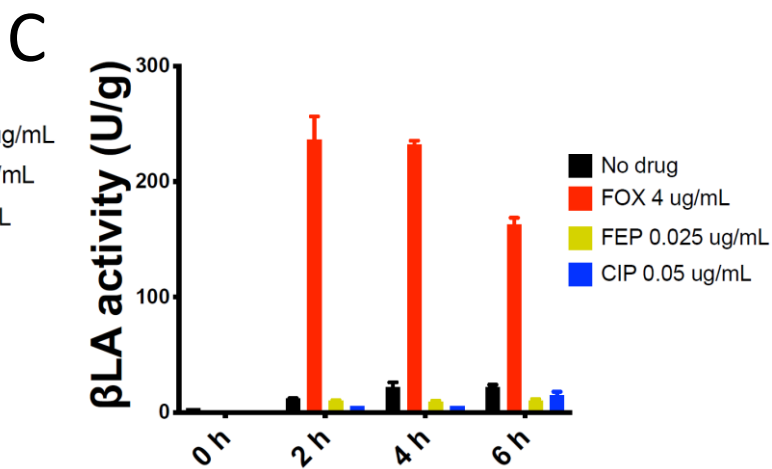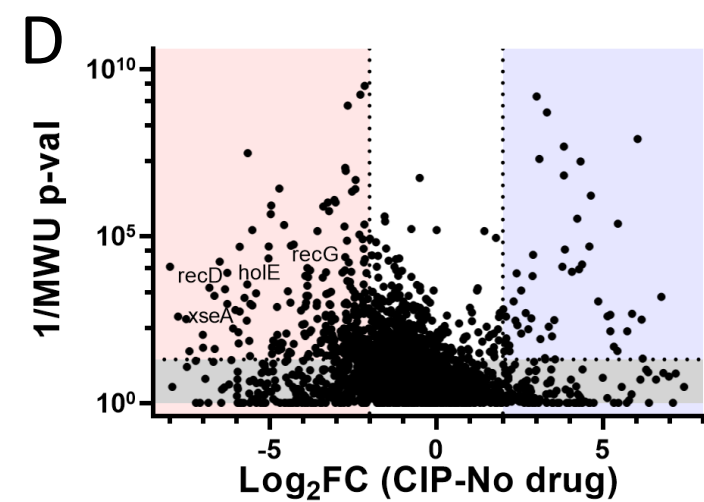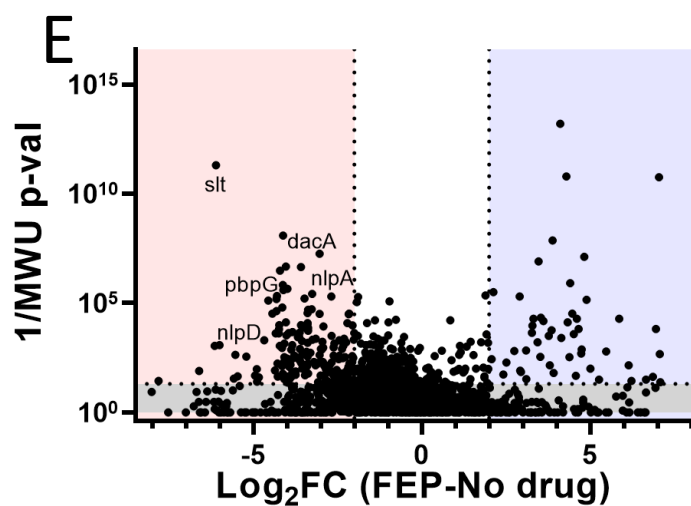

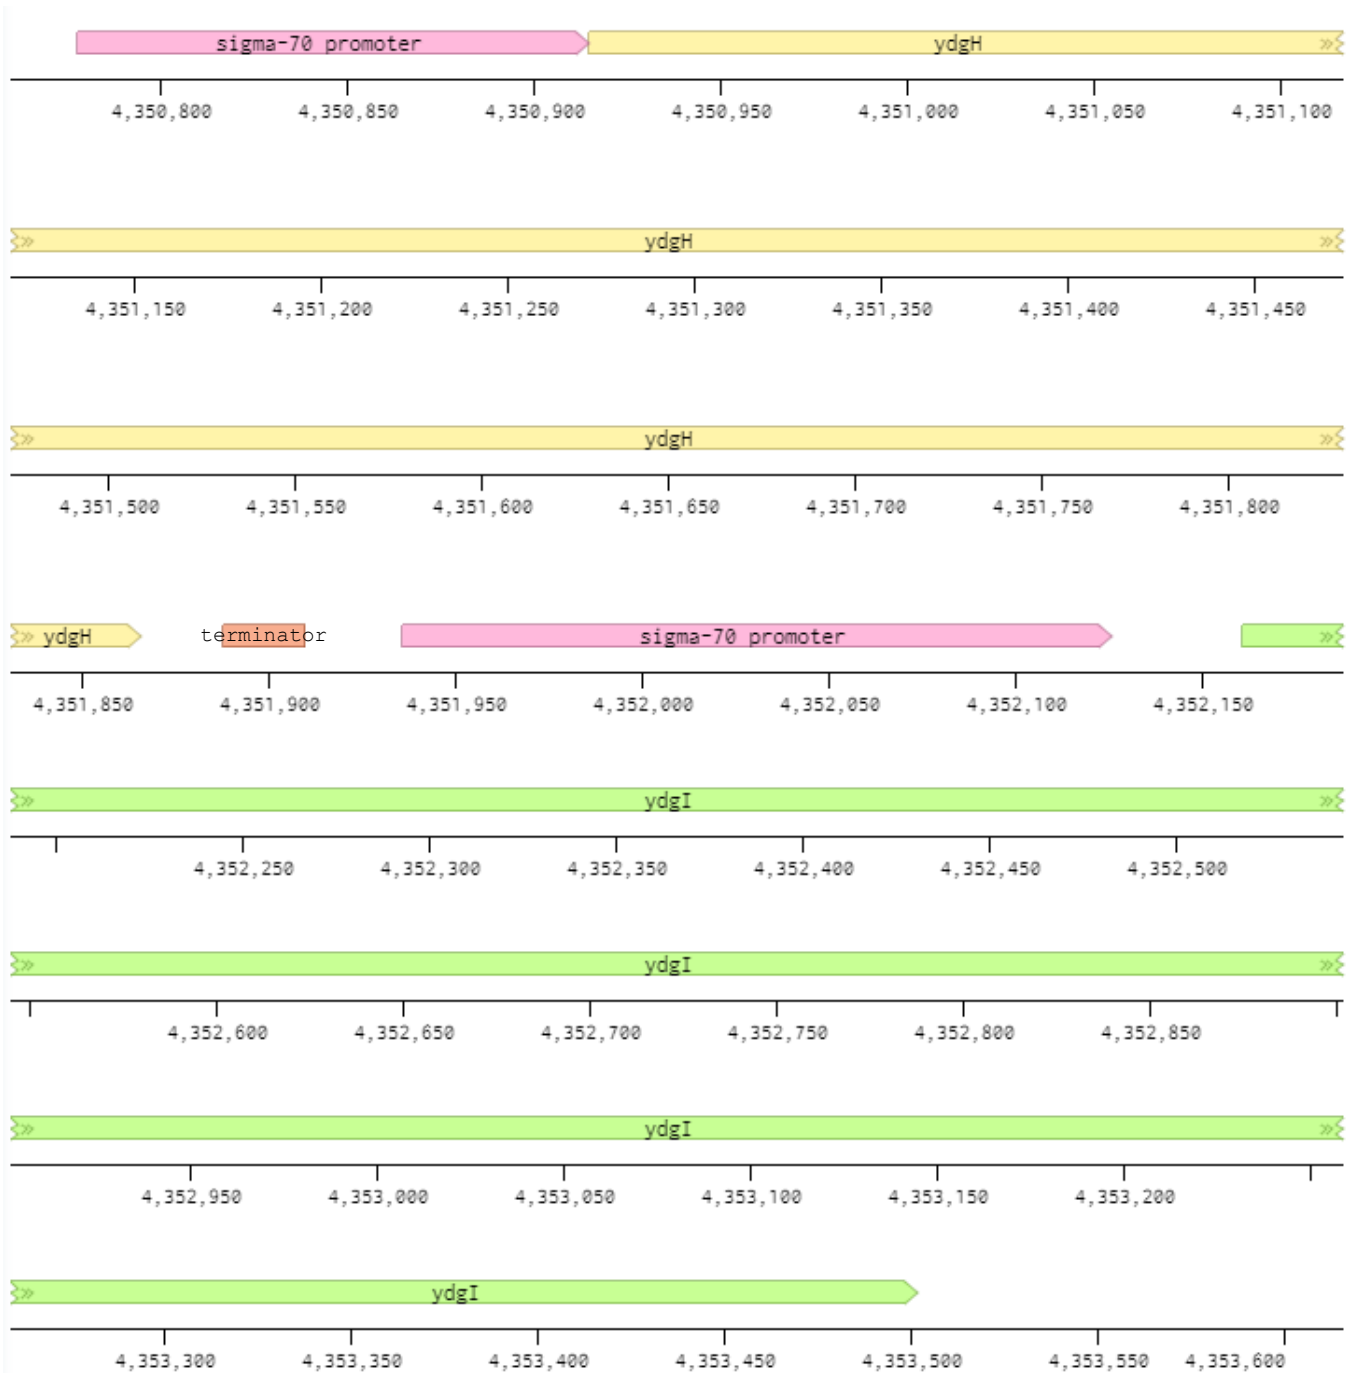

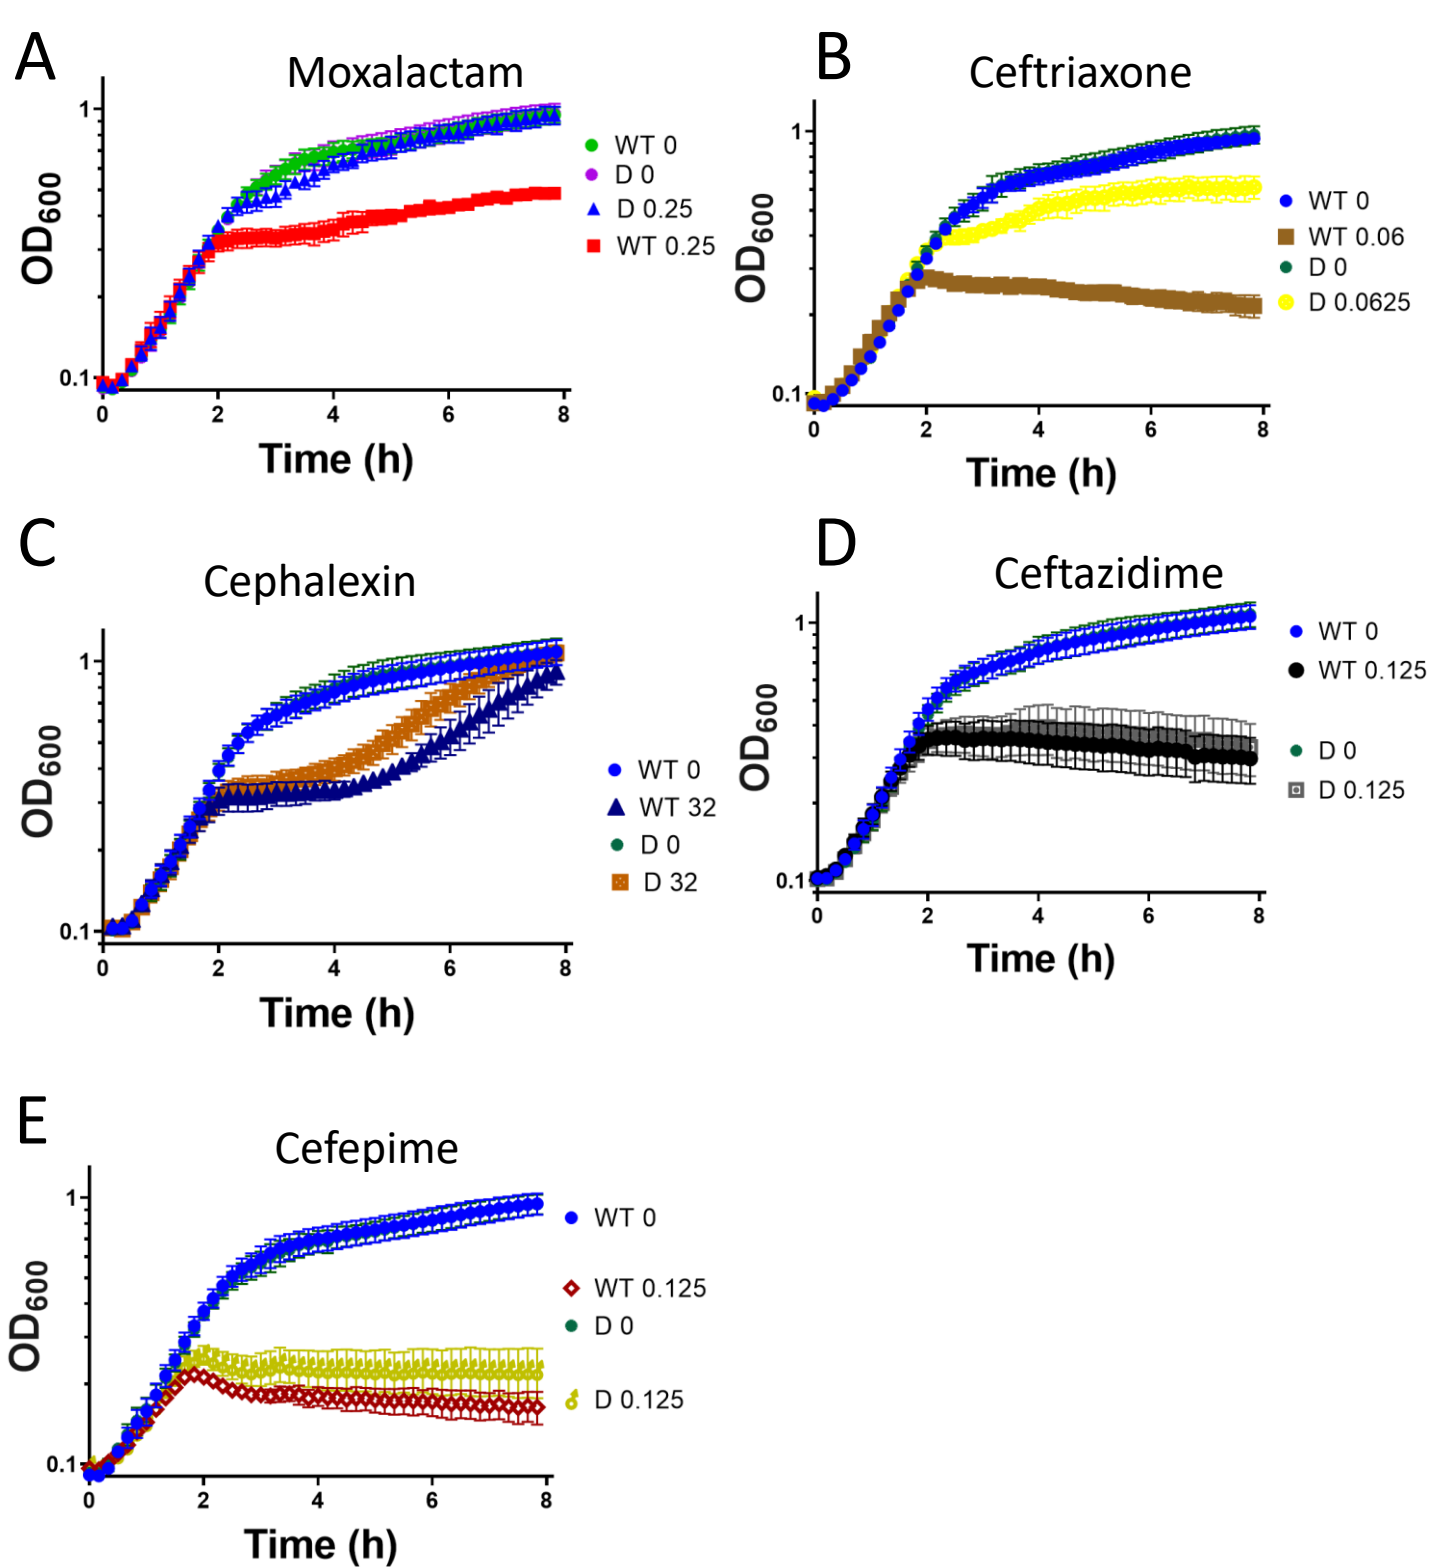

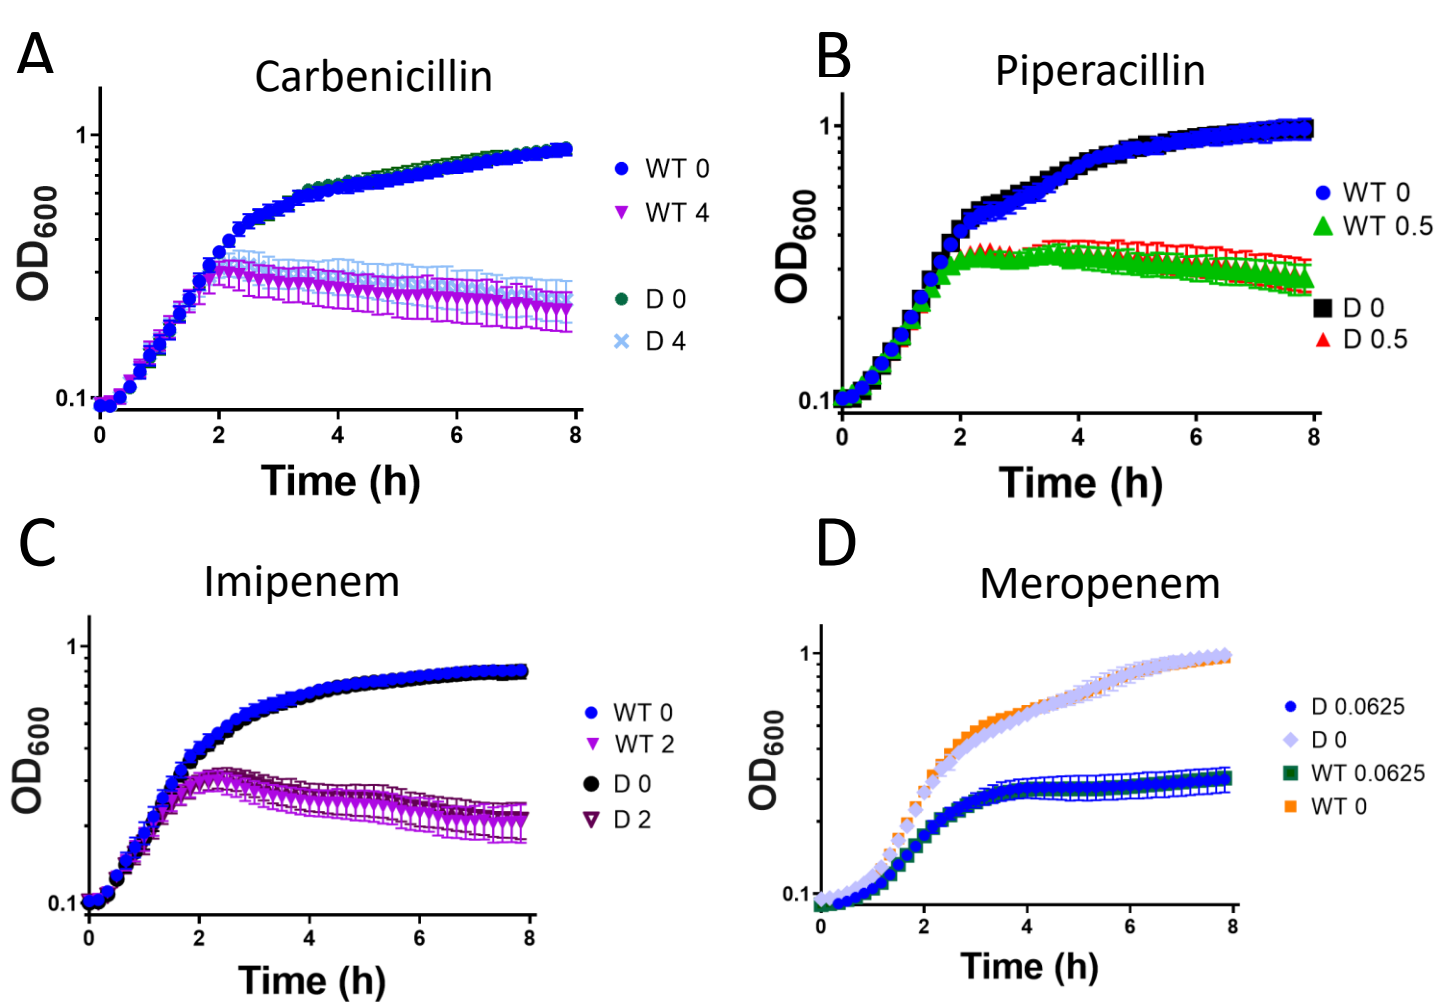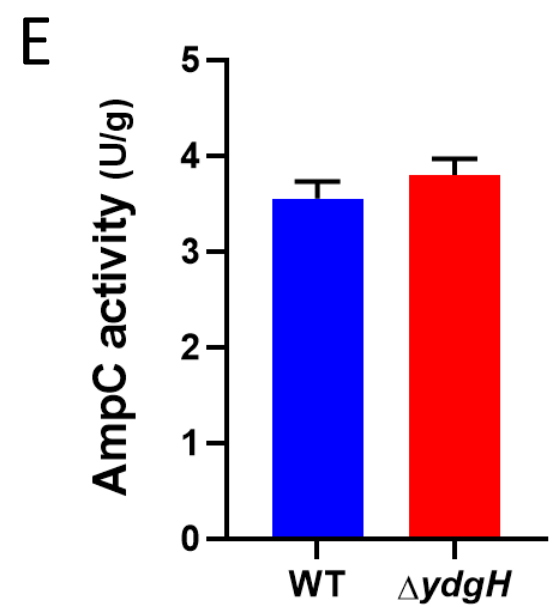

**A****Ciprofloxacin**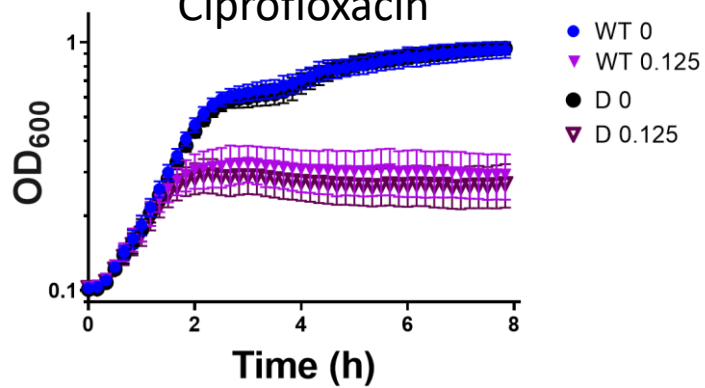**B****Trimethoprim**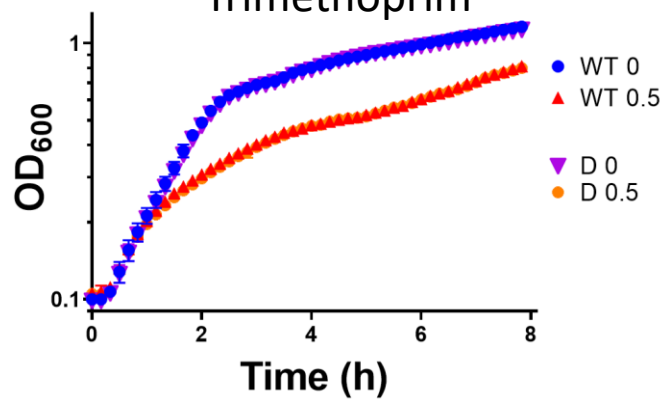**C****Gentamicin**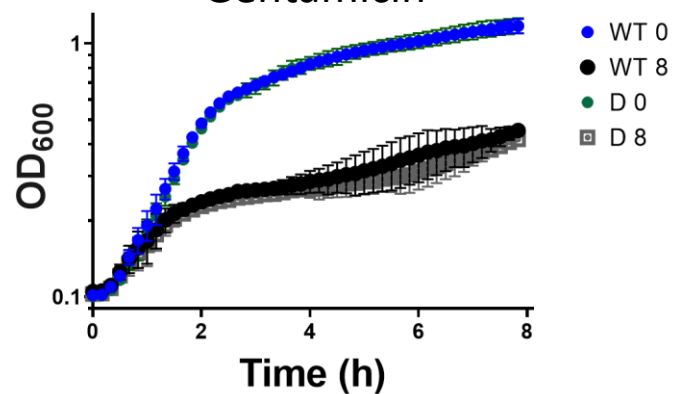**D****Chloramphenicol**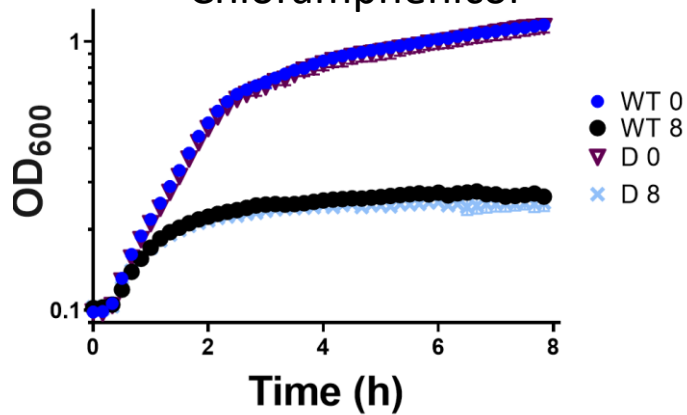



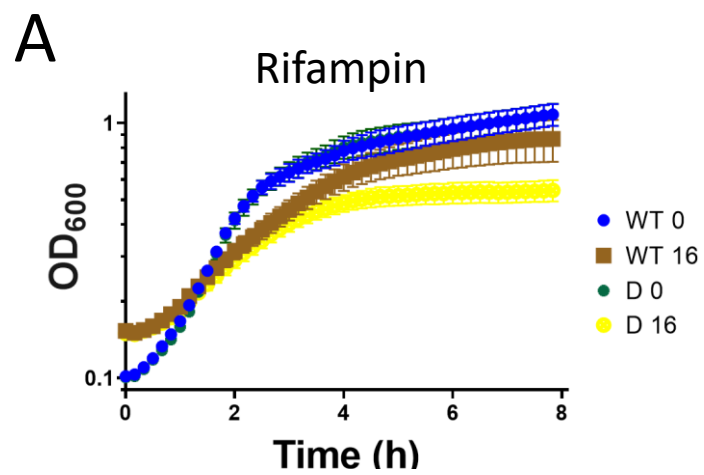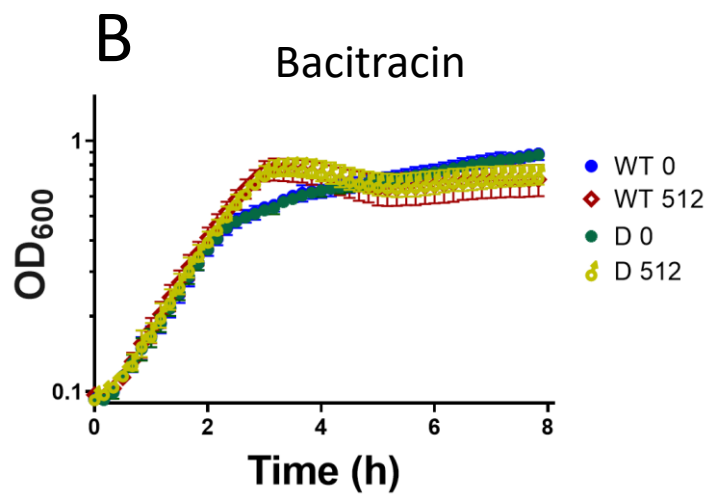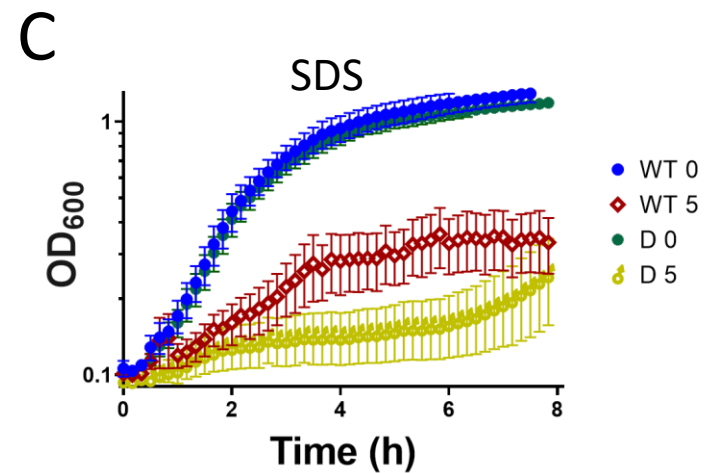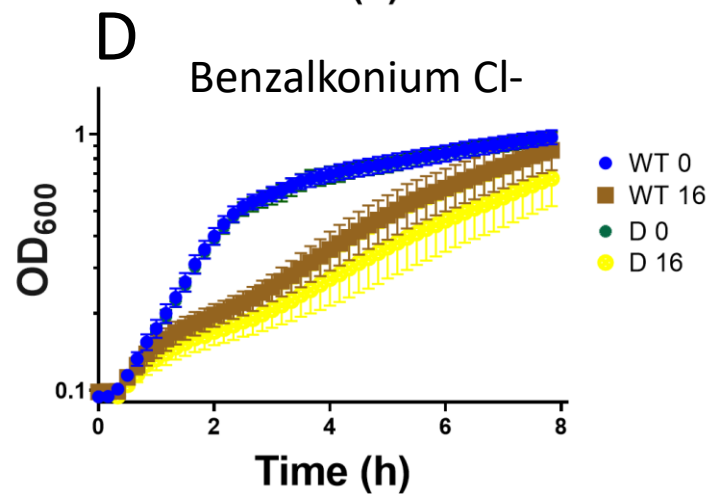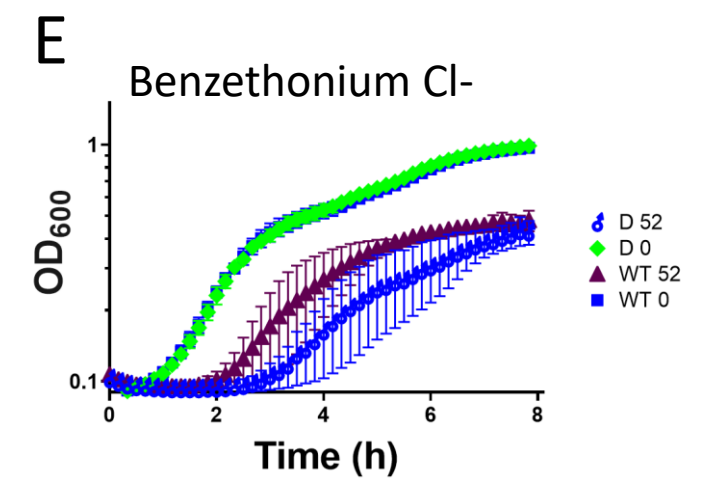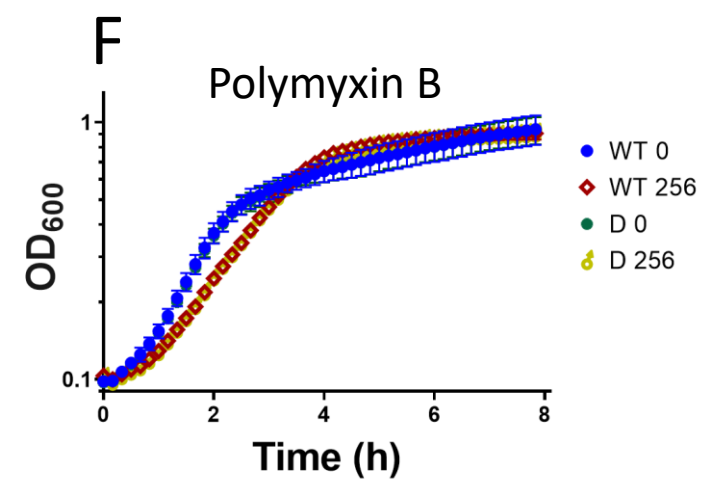

Supplement: aac.00786-21-s0001.pdf [file aac.00786-21-s0001.pdf]
